# Supplementary material for: Organic nitrate chemistry and its implications for nitrogen budgets in an isoprene- and monoterpene-rich atmosphere: constraints from aircraft (SEAC 4 RS) and ground-based (SOAS) observations in the Southeast US
Source: Copernicus journal article supplement (doi:10.5194/acp-2016-52), 2016-02-04
Supplement: Supplementary file 1 [file acp-2016-52-supplement.pdf]

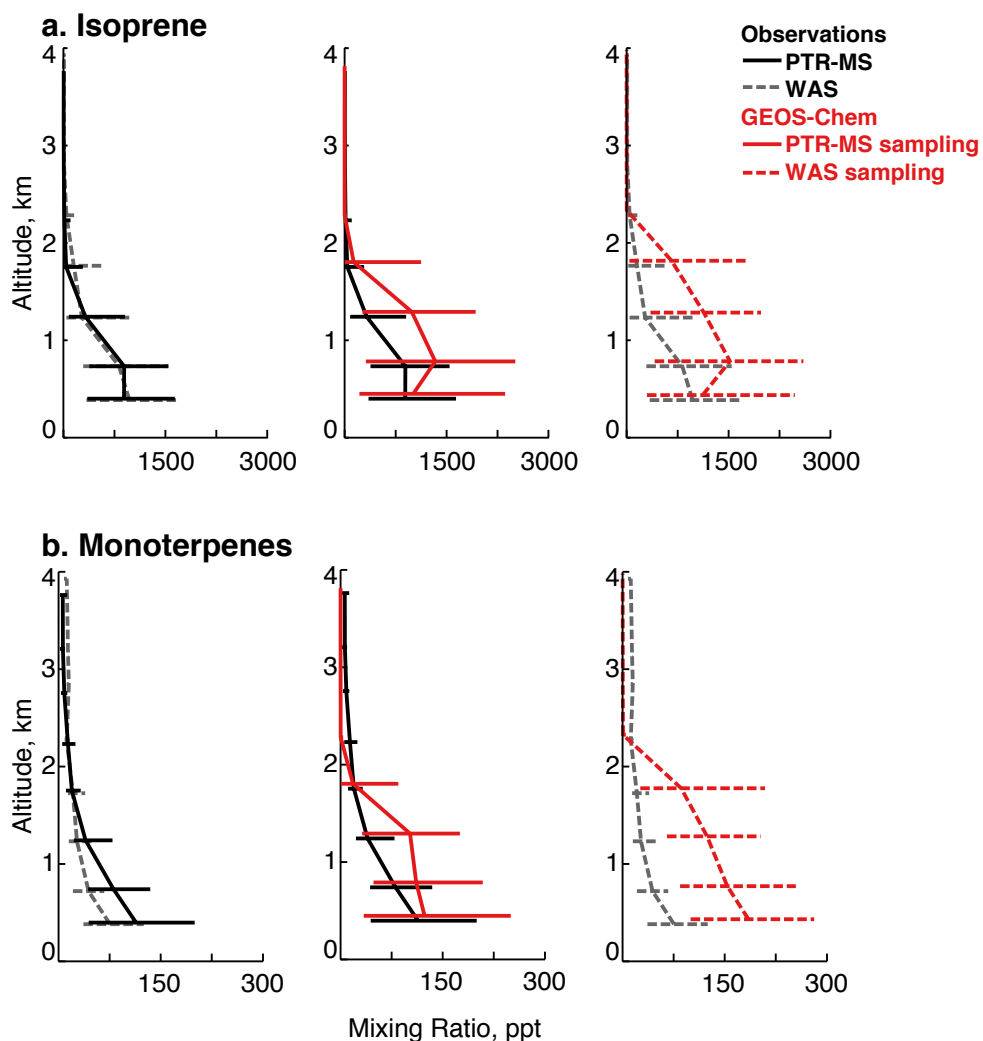

**Figure S1.** Comparison of median vertical profiles from PTR-MS (solid black) and Whole Air Sampler (WAS) measurements of isoprene and monoterpenes ( $=\alpha$ -pinene $+\beta$ -pinene for the WAS) over the Southeast US during SEAC<sup>4</sup>RS (left). The observations are also compared to the GEOS-Chem simulation sampled in the same manner as each measurement in the center (PTR-MS) and right (WAS) panels.

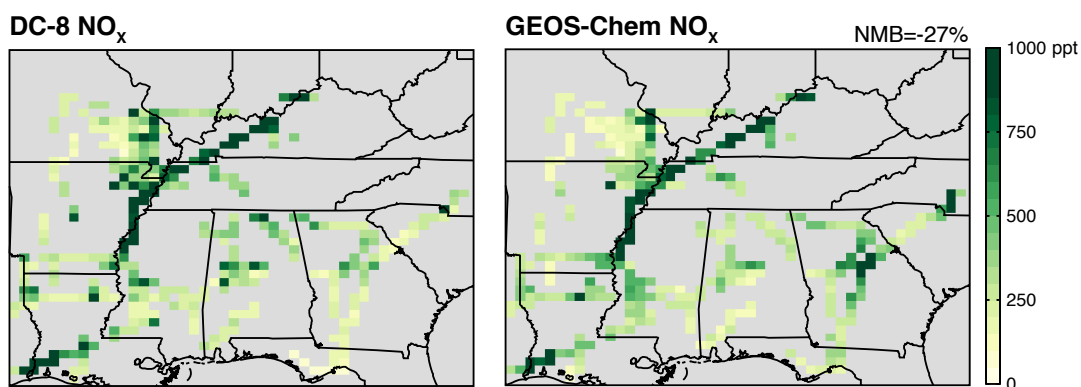

**Figure S2.** Same as Fig. 4, but for NO<sub>x</sub>.

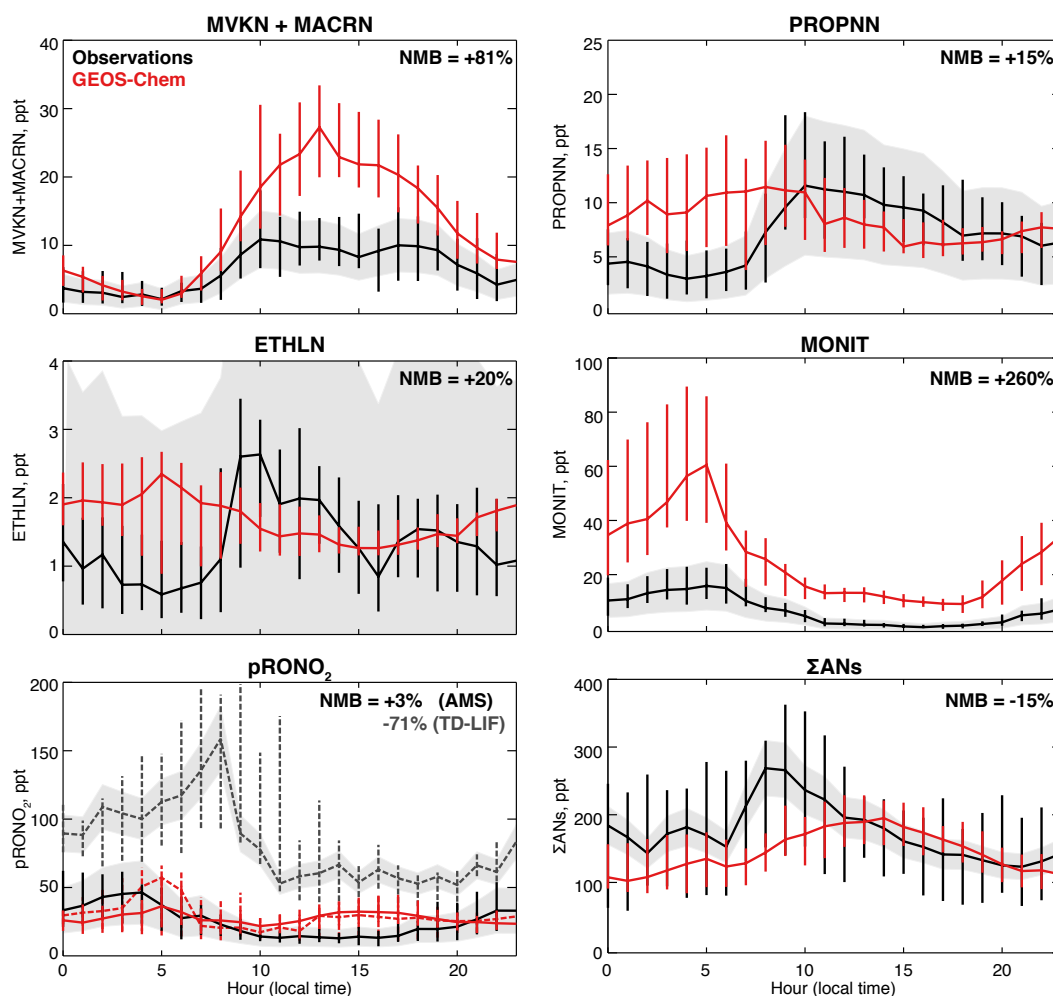

**Figure S3.** Same as Fig. 6, but for individual second generation isoprene nitrates (MVKN+MACRN, PROPNN, ETHLN) and summed first generation monoterpene nitrates (MONIT) from the CIT-ToF-MS (1 June – 4 July), particulate organic nitrates (pRONO<sub>2</sub>) from the AMS (9 June – 15 July) and the TD-LIF (29 June – 15 July), and total organic nitrates (ΣANs) from the TD-LIF (1 June – 15 July).

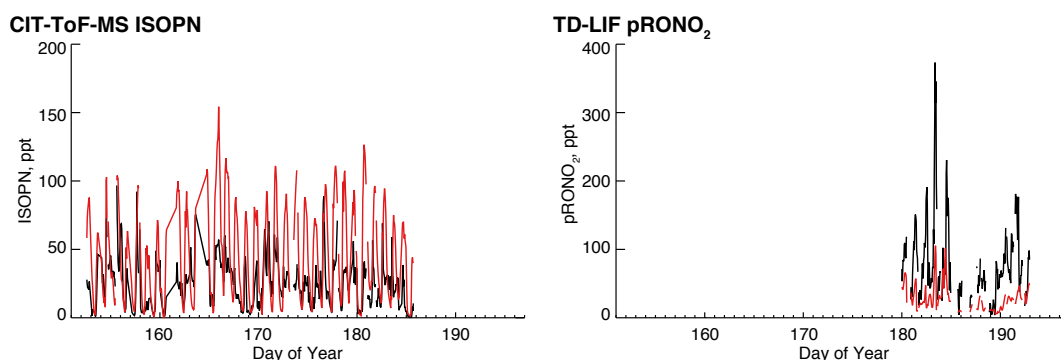

**Figure S4.** Same as Fig. 8, but for ISOPN measured by CIT-ToF-MS and for pRONO<sub>2</sub> measured by TD-LIF.
